## **Exposome Epidemiology for Suspect Environmental Chemical Exposures during Pregnancy Linked to Subsequent Breast Cancer Diagnosis**

Young-Mi Go<sup>1</sup>, Jaclyn Weinberg<sup>1</sup>, Sami Teeny<sup>1</sup>, Piera Cirillo<sup>2</sup>, Nickilou Krigbaum<sup>2</sup>, Grant  
Singer<sup>1</sup>, ViLinh Ly<sup>1</sup>, Barbara Cohn<sup>2†</sup> and Dean P. Jones<sup>1†</sup>

<sup>1</sup> Clinical Biomarkers Laboratory, Division of Pulmonary, Allergy, Critical Care, and Sleep  
Medicine, Department of Medicine, Emory University, Atlanta, GA 30322

<sup>2</sup> The Center for Research on Women and Children's Health, Child Health and Development  
Studies, Public Health Institute, Berkeley, CA 94709

Running Head: Exposome epidemiology of breast cancer

† Corresponding authors:

DPJ: Whitehead Biomedical Research Building, 615 Michael St, Room 205P

Atlanta, GA, 30322. Phone: 404-727-5970. Fax: 404-727-2974. E-mail: [dpjones@emory.edu](mailto:dpjones@emory.edu)

BC: 1683 Shattuck Avenue, Suite B, Berkeley, CA 94709. E-mail: [bcohn@chdstudies.org](mailto:bcohn@chdstudies.org)

1 **Author Contributions**

- 2 • Designed research – YMG, PC, DPJ, BC
- 3 • Performed research – YMG, NK, VL, GS
- 4 • Analyzed data – YMG, JW, ST, PC, NK, GS, DPJ, BC
- 5 • Wrote the paper – YMG, ST, NK, PC, DPJ, BC

6

7 **Declaration of Competing Financial Interests**

8 The authors declare they have no actual or potential competing financial interests.

## ABSTRACT

9 Breast cancer is now the most common cancer globally, accounting for 12% of all new annual  
10 cancer cases worldwide. Despite epidemiologic studies having established a number of risk  
11 factors, knowledge of chemical exposure risks is limited to a relatively small number of  
12 chemicals. In this exposome research study, we used non-targeted, high-resolution mass  
13 spectrometry (HRMS) of pregnancy cohort biospecimens in the Child Health and Development  
14 Studies (CHDS) to test for associations with breast cancer identified via the California Cancer  
15 Registry. Second (T2) and third (T3) trimester archival samples were analyzed from 182 women  
16 who subsequently developed breast cancer and 384 randomly selected women who did not  
17 develop breast cancer. Environmental chemicals were annotated with the Toxin and Toxin-  
18 Target Database (T3DB) for chemical signals that were higher in breast cancer cases and used  
19 with an exposome epidemiology analytic framework to identify suspect chemicals and associated  
20 metabolic networks. Network and pathway enrichment analyses showed consistent linkage in  
21 both T2 and T3 to inflammation pathways, including linoleate, arachidonic acid and  
22 prostaglandins, and identified new suspect environmental chemicals associated with breast  
23 cancer, i.e., an N-substituted piperidine insecticide and a common commercial product, 2,4-  
24 dinitrophenol (DNP), linked to variations in amino acid and nucleotide pathways in T2 and  
25 benzo[a]carbazole and a benzoate derivative linked to glycan and amino sugar metabolism in T3.  
26 The results identify new suspect environmental chemical risk factors for breast cancer and  
27 provide an exposome epidemiology framework for discovery of suspect environmental  
28 chemicals and potential mechanistic associations with breast cancer.

29

30 **Keywords:** Cancer, exposome, metabolomics, pregnancy

31 **Abbreviations**

32 BC, breast cancer; FDR, false discovery rate; HRM, high-resolution metabolomics; HRMS,  
33 high-resolution mass spectrometry; LC-HRMS, liquid chromatography-high resolution mass  
34 spectrometry; MWAS, metabolome-wide association study;  $m/z$ , mass to charge; RT, retention  
35 time; T2, second trimester; T3, third trimester, T3DB, the toxin and toxin-targeted database.

## 36 **1. Introduction**

37 High-resolution metabolomics (HRM) uses advanced mass spectrometry and data science for  
38 non-targeted analysis of biological samples to obtain insight into an individual's metabolism  
39 along with the individual's exposome, including chemicals derived from diet, intestinal  
40 microbiome, dietary supplements, pharmaceuticals, personal use products and environmental  
41 exposures (Jones *et al.* 2012). The metabolome is a functional readout of the interactions of a  
42 person's genes with exposures from diet and environment (Johnson *et al.* 2017; Jones *et al.* 2016;  
43 Niedzwiecki *et al.* 2019) and has been used extensively in combination with exposure  
44 measurements, such as air pollution (Liang *et al.* 2018; Ritz *et al.* 2022) and targeted  
45 environmental chemicals, such as DDT, PCBs and PBB (Hu *et al.* 2020; Walker *et al.* 2019), to  
46 gain understanding of functional associations with exposures. Use in a non-targeted manner for  
47 discovery of new chemical associations with disease, however, are limited. A vision for  
48 development of exposome epidemiology, i.e., using omics scale biomonitoring for disease  
49 epidemiology, is available (Jones and Cohn 2020). The current study was undertaken to apply  
50 exposome epidemiology concepts for discovery of potential new environmental factors  
51 contributing to breast cancer. The long-term goal for complex diseases such as breast cancer,  
52 which involves multiple genetic, behavioral and environmental factors, is to integrate omics  
53 scale biomonitoring with other factors to ultimately improve prediction and intervention  
54 strategies to decrease disease burden.

55 To perform a non-targeted exposome-wide association study of breast cancer, we used  
56 archival blood samples from the, Child Health and Development Studies (CHDS) cohort  
57 collected during pregnancy from 1959-1967. Second (T2) and third (T3) trimester archival

58 samples, collected from 1959-1967, of 182 women who subsequently developed breast cancer,  
59 were compared to those from 384 women who did not develop breast cancer.

60 We developed an exposome epidemiology approach (**Fig 1**) in which we first performed  
61 non-targeted statistical analysis to select HRM features that were higher in cases than in non-  
62 cases. In this selection, we use raw  $p < 0.05$  as a cutoff for selection based upon the expectation  
63 that multiple environmental factors with small effect size may contribute to breast cancer, and  
64 this more liberal selection criteria is more appropriate for a small-population discovery study  
65 because it provides a better balance between Type 1 and Type 2 statistical error than more  
66 rigorous False Discovery Rate (FDR) criteria. We selected HRM features that were higher in  
67 cases than non-cases to search for potentially causative factors by matching to a xenobiotic  
68 database, Toxin and Toxin-Target Database (T3DB) (Lim *et al.* 2010; Wishart *et al.* 2015),  
69 recognizing that protective factors that are decreased in association with breast cancer would  
70 prioritize use of HRM features that were lower in cases and an alternative database, such as Food  
71 Database (FoodDB) (Scalbert *et al.* 2011). HRM features that were increased with breast cancer  
72 and annotated as environmental chemicals were then used for network analysis with the data-  
73 dependent community detection tool, xMWAS (Uppal *et al.* 2018). Pathway enrichment  
74 analysis of the most central communities was then performed with *mummichog* (Li *et al.* 2013),  
75 and targeted mass spectrometry was used to improve understanding of the annotated chemicals  
76 associated with breast cancer outcome. The results provide evidence for new candidate  
77 environmental breast carcinogens and information concerning possible mechanisms by which  
78 these agents contribute to breast cancer.

79

## 80 **2. Materials and methods**

### 81 *2.1 Samples and Assays*

82 The CHDS recruited women residing in the Oakland and East Bay, California area who  
83 were members of the Kaiser Foundation Health Plan and received obstetric care for pregnancies  
84 between 1959 and 1966 with deliveries extending into 1967 (van den Berg *et al.* 1988). More  
85 than 98% of all eligible women enrolled.

86 Blood samples were collected from these mothers during pregnancy in each trimester and  
87 in the early post-partum period, processed to isolate serum, and stored since then at  $-20^{\circ}$  Celsius.  
88 Second and third trimester archival samples available were analyzed for HRM and  
89 environmental chemicals. The samples used for the present study include second (T2, n=182))  
90 and third (T3, n=172)) trimester archival samples of 201 women who subsequently developed  
91 breast cancer, compared to second (T2, n=384) and third (T3, n=351) trimester archival samples  
92 from 413 women who did not develop breast cancer. Breast cancer cases were identified by  
93 linkage to the California Cancer Registry for cases diagnosed through 1997. Record abstraction  
94 for cancer diagnoses to the California Cancer Registry is based primarily on pathology reports,  
95 and case identification is considered to be >99% complete after a 2-year lag (Perkins *et al.*).  
96 Cases were defined as mothers with incident invasive or noninvasive breast cancer diagnosed at  
97 a median age at diagnosis of 54 years (interquartile range, 13 years) with available prenatal  
98 serum and a standardized gross placental exam. Non-cases were an 8% sample of women not  
99 known to have breast cancer randomly selected among mothers with available prenatal serum  
100 and a standardized gross placental exam (Cohn *et al.* 2017). Breast cancer rates for included and  
101 excluded subsets in the CHDS cohort were highly comparable suggesting selection did not  
102 impose significant bias: 1.89 per 1,000 person-years (95% Confidence Interval ([95% CI] = 1.60,

103 2.23) for included vs. 1.88 per 1,000 (95% CI=1.59, 2.20) for excluded. It is possible, however,  
104 that we missed some cases of breast cancer, including among women who are identified in this  
105 study as “non-cases”. In this case, failure to identify cases among the non-case group would  
106 result in underestimating differences between cases and non-cases in these analyses and would  
107 not be expected to impact findings. The CHDS founding mothers voluntarily participated in an  
108 in-person interview and gave permission to access their own medical records and those of their  
109 children to researchers. The institutional review board of the Public Health Institute approved the  
110 present study (IRB#120-002), and we complied with all federal guidelines governing the use of  
111 human participants. Forty-six percent of cases and forty-five percent of the non-cases had  
112 available data and serum.

113

## 114 2.2 Chemicals

115 HPLC grade acetonitrile and methanol, LC-MS water and 98% formic acid were obtained from  
116 Sigma-Aldrich (St. Louis, MO). A mixture of 14 stable isotopic chemicals were used as an  
117 internal standard (Go *et al.* 2015) included [<sup>13</sup>C<sub>6</sub>]-D-glucose, [<sup>15</sup>N]-indole, [2-<sup>15</sup>N]-L-lysine  
118 dihydrochloride, [<sup>13</sup>C<sub>5</sub>]-L-glutamic acid, [<sup>13</sup>C<sub>7</sub>]-benzoic acid, [3,4-<sup>13</sup>C<sub>2</sub>]-cholesterol, [<sup>15</sup>N]-L-  
119 tyrosine, [trimethyl-<sup>13</sup>C<sub>3</sub>]-caffeine, [<sup>15</sup>N<sub>2</sub>]-uracil, [3,3-<sup>13</sup>C<sub>2</sub>]-cystine, [1,2-<sup>13</sup>C<sub>2</sub>]-palmitic acid,  
120 [<sup>15</sup>N,<sup>13</sup>C<sub>5</sub>]-L-methionine, [<sup>15</sup>N]-choline chloride and 2'-deoxyguanosine-<sup>15</sup>N<sub>2</sub>,<sup>13</sup>C<sub>10</sub>-5'-  
121 monophosphate from Cambridge Isotope Laboratories, Inc (Andover, PA).

122

123 2.3 High-resolution mass spectrometry. Serum samples were analyzed with liquid  
124 chromatography-high resolution mass spectrometry (LC-HRMS) as described previously (Jarrell  
125 *et al.* 2021; Jarrell *et al.* 2020). Briefly, 50 µL of serum was treated 2:1 (v/v) with acetonitrile,



126 and 2.5  $\mu\text{L}$  of the stable isotope standard mixture was added. Proteins were precipitated by  
127 incubation at 4°C for 30 min and removed by centrifugation for 10 min at 21000 x  $g$  at 4°C.  
128 Supernatants were placed in autosampler vials and maintained at 4°C in an autosampler until  
129 analysis. Two pooled human reference samples including NIST SRM1950 and Qstd [pooled  
130 plasma from 2 separate lots from Equitech-Bio, Inc (Kerrville, Texas)] were included. NIST  
131 SRM1950 was run at the beginning and end of the full sample set, and Qstd was included at the  
132 beginning and end of each batch of 20 samples.

133 Samples and reference materials were analyzed with three technical replicates using a  
134 High-Field Q-Exactive mass spectrometer (Thermo Fisher) with C18 chromatography and  
135 electrospray ionization (ESI) in negative mode. Data collection occurred continuously  
136 throughout 5 min of chromatographic separation from 85 to 1,275 mass-to-charge ratio ( $m/z$ ).  
137 Data extraction was performed using *apLCMS* and *xMSanalyzer*, generating mass spectral  
138 features consisting of  $m/z$ , retention time (RT) and peak intensity. Feature and sample filtering  
139 retained features with a median CV of 50% or less, a minimum mean Pearson correlation  
140 coefficient of 0.7 between technical replicates of each sample, and presence in at least 30% of  
141 samples.

142  
143 *2.4 Selection of features associated with subsequent breast cancer.* A Metabolome-Wide  
144 Association Study (MWAS) was used to identify  $m/z$  features associated with breast cancer  
145 outcome. Intensity values were  $\log_2$  transformed, and LIMMA was performed using the R  
146 package, *xmsPANDA* (<https://github.com/kuppall2/xmsPANDA>), with retention of features at raw  
147  $p < 0.05$ .

148

149 *2.5 Annotation of Mass Spectral Features and Metabolite Identification.* To select mass spectral  
150 features of environmental interest, features positively associated with subsequent breast cancer  
151 diagnosis were subjected to a multistage clustering algorithm and annotated with xMSannotator  
152 (Uppal *et al.* 2017) using T3DB (Lim *et al.* 2010; Wishart 2015) at 5 ppm tolerance. For  
153 selected chemicals, identities were confirmed when possible by accurate  $m/z$  match, co-elution  
154 with authentic standards and ion dissociation mass spectrometry (MS/MS); Level 1 identification  
155 by criteria of Schymanski *et al.* (Schymanski *et al.* 2014)].

156  
157 *2.6 Targeted mass spectrometry analysis in identification of features.* Annotated chemicals at the  
158 center of the *xMWAS* network structures underwent additional investigation by ion fragmentation,  
159 structure analysis, and spectral matching to publicly available spectral libraries. Plasma samples  
160 with the highest intensities of the chemicals of interest were selected and analyzed with C18  
161 liquid chromatography (Dionex Ultimate 3000) and MS<sup>2</sup> ion fragmentation (Thermo Scientific  
162 Fusion) with negative ESI. The mass spectrometer was set to scan a minimal range of  $m/z$ 's at  
163 60k resolution for MS<sup>1</sup>. Then, an inclusion list isolated the  $m/z$  of interest. MS<sup>2</sup> fragmentation  
164 was acquired in HCD mode with a normalized collision energy of 30% and analyzed at 30,000  
165 resolution using the dual-pressure linear ion trap. Raw MS<sup>1</sup> and MS<sup>2</sup> spectra were analyzed in  
166 xCalibur QualBrowser (Thermo). Fragmentation patterns were analyzed with ChemDraw  
167 (PerkinElmer Informatics) and compared against experimental spectra in the MassBank of North  
168 America (MoNA) library. MoNA MS<sup>2</sup> spectra were selected for negative ESI and similar  
169 collision energy. When MoNA spectra were not available, experimental spectra were searched  
170 against the NIST Tandem Mass Spectral Library, which provides a spectral match percentage but  
171 no information on collision energy or ionization polarity. To align with the goal of high-

172 throughput analyses, chromatographic gradients and fragmentation settings were maintained to  
173 be consistent with the original analysis and not extensively optimized for each chemical. Under  
174 these conditions, the complexity of the plasma sample matrix and the low abundance of  
175 environmental chemicals does not allow for the isolation of one precursor and its fragments.  
176 Therefore, in some spectra, the precursor mass is easily visible within 10 ppm error, but the  
177 fragments are not clearly visible due to interference from other ions. Spectral peaks  
178 corresponding to fragments were identified by their theoretical structures in “ChemDraw” with  
179 unit resolution in the dual-pressure linear ion trap detector.

180

181 *2.7 Network and Pathway Analyses.* Annotated environmental chemicals were tested for  
182 associations with  $m/z$  features using *xMWAS* based on partial least-squares regression (Uppal *et*  
183 *al.* 2018). Thresholds for inclusion in the networks were  $|r| > 0.30$  and  $p < 0.05$ . Pairwise results  
184 from MWAS of the metabolites used for generation of network structures were used for pathway  
185 enrichment analysis using *mummichog (v3)* (Li *et al.* 2013). Enriched pathways were filtered for  
186 those that included at least 3 significantly associated metabolites at  $p < 0.05$ .

187

188

189 **3. RESULTS**

190

191 *3.1 Study population demographics*

192 T2 and T3 samples were available from 201 individuals who subsequently developed breast  
193 cancer. These individuals had a median age of 31 y at time of blood collection, and the  
194 individuals without breast cancer had a median age of 36 ( $p < 0.0001$ ). Serum collection occurred  
195 between 1960 and 1964, with T2 blood collection occurring at a median gestational age of 161  
196 and 160 days in cases and non-cases, respectively. For T3, blood collections were at a median  
197 gestational age of 249 and 250 days, respectively. Characteristics of cases and non-cases are  
198 provided in **Table 1**.

199

200 *3.2 Metabolic feature profiling on T2 and T3 serum*

201 To select  $m/z$  features which were positively associated with subsequent breast cancer diagnosis,  
202 we retained 9042  $m/z$  features present in at least 80% of samples for statistical analyses and  
203 selection of features for annotation. For T2 and T3 measurements, no features had  $FDR < 0.05$   
204 and therefore none are likely to be useful biomarkers for breast cancer risk. Any of the  $m/z$   
205 features selected with raw  $p < 0.05$  could contribute to breast cancer risk, and 521 features had  
206  $p < 0.05$  for T2, and 557 features had  $p < 0.05$  for T3. Of these  $m/z$  features, 188 were higher in  
207 breast cancer than non-cases in T2 samples while 151 were higher in breast cancer than non-  
208 cases in T3 samples (**Table 2**). These positively associated  $m/z$  features were selected to search  
209 for possible matches to environmental chemicals.

210

211 *3.3 Environmental chemical annotation of suspect chemicals in breast cancer group*

212 Most of the selected  $m/z$  features are likely to represent endogenous metabolites, but  
213 environmental chemicals contributing to subsequent breast cancer could also be present. To  
214 search for suspect environmental chemicals associated with subsequent breast cancer diagnosis,  
215 we used xMSannotator, a network-based computational tool, with the Toxin and Toxin-Target  
216 Database, T3DB (Wishart 2015; Wishart *et al.* 2007), to further characterize the mass spectral  
217 features which were higher in their intensities in women who went on to develop breast cancer.  
218 xMSannotator uses a multistage clustering algorithm in which intensity profiles, retention time  
219 characteristics, mass defect, and isotope/adduct patterns are used to assign confidence levels to  
220 annotation results relative to publicly available databases, such as T3DB. The annotated  
221 environmental chemicals for T2 and T3 are shown in **Table 3** and **Table 4**, respectively. More  
222 environmental chemicals were annotated in T2 than T3 serum, yielding 17 and 7, respectively,  
223 and these included matches to chemicals widely used for anti-inflammatory, anticonvulsant and  
224 antipsychotic drugs, quaternary ammonium salt, pesticides, herbicides, fungicides, plasticizers,  
225 preservatives, cleaning materials, and flavorings. Importantly, at this level of investigation, these  
226 annotations are only suspect chemicals and require further investigation and verification (see  
227 below). The magnitude of difference was between 10% and 30% higher in women who went on  
228 to develop breast cancer compared to those who did not ( $p \leq 0.05$ , **Tables 3 and 4**).

229

### 230 *3.4 Metabolome-Wide Association Study (MWAS) of T2 Environmental Chemicals*

231 Prior studies have identified inflammatory lipid pathways (linoleate, arachidonate,  
232 prostaglandin), lipid and energy metabolism pathways (fatty acids, TCA cycle), oxidative stress  
233 pathways (methionine and cysteine), and nitrogen metabolism pathways (urea cycle, pyrimidine,  
234 purine) as top metabolic pathway associations with environmental chemicals and breast cancer

235 (Hu *et al.* 2019; Li *et al.* 2020; Walker *et al.* 2019). To determine whether the features annotated  
236 as environmental chemicals (**Table 3**) are associated with changes in metabolites and metabolic  
237 pathways, we used data-driven integration and network analysis of the T3DB annotated features  
238 and all 9042 extracted metabolic signals, with xMWAS (Uppal *et al.* 2018). As shown in **Fig 2**,  
239 network analysis showed three metabolic communities, Community 1 (C1, orange), Community  
240 2 (C2, blue) and Community 3 (C3, green). C1 was positively associated with  $m/z$  315.1957  
241 (F1, **Fig 2, Table 3**). We performed metabolic pathway enrichment analysis (**Fig 3**) on the 716  
242 metabolic features associated with C1 using the *mummichog 3* software (Li *et al.* 2013).  
243 Associated pathways included linoleate, arachidonate and prostaglandins (**Fig 3A**), which are  
244 closely related to inflammation and oxidative stress. Database searches showed that  $m/z$   
245 315.1957 matched multiple lipids (e.g., prostaglandins, resolvins), consistent with the strong  
246 associations with related lipid species having activities in inflammation. The vitamin A pathway  
247 was also associated with C1 (**Fig 3A**), and targeted mass spectrometry with MS/MS analysis  
248 showed a likelihood that  $m/z$  315.1957 was 4-hydroxyretinoic acid (**F1, Supplemental Fig. S1**).  
249  
250 C1 extensively overlapped with Community 2 (C2, blue), which was positively associated with  
251  $m/z$  334.2090 (F2, **Fig 2, Table 3**). In addition to pathway associations with prostaglandins,  
252 linoleic acid and arachidonic acid, a subset of C2 included phospholipids, e.g., sphingosine,  
253 phosphatidyl choline (PC), and triglyceride (blue, **Fig 2**), associated with glycerophospholipid  
254 metabolism. Thus, this chemical defines a separate cluster of metabolites associated with breast  
255 cancer than those in C1, but this feature remains unidentified because subsequent mass  
256 spectrometry analysis failed to provide support for identification. Together, results from C1 and  
257 C2 support prior findings that inflammatory lipid and other lipid pathways associated with DDT,

258 PCB and PBB are associated with breast cancer, but do not reveal any new suspect  
259 environmental chemicals.  
260  
261 A third community, C3, had metabolomic associations (green) which were separated from C1  
262 and C2 and positively associated with *m/z* features annotated as environmental chemicals,  
263 including an insecticide (F3, nitromethylene-piperidine), a wood preservation and dye production  
264 chemical (F4, 2,4-dinitrophenol), oxalate (F5), and F6, *m/z* 156.0666 and F7, *m/z* 345.0777 (**Fig**  
265 **2, Table 3**). Of these, oxalate was previously confirmed, and supportive targeted mass  
266 spectrometry data was obtained for 2-nitromethylene-piperidine and 2,4-dinitrophenol (**F3 and**  
267 **F5, Supplemental Fig. S1**). The *m/z* feature 156.0666 (F6) was present at high concentrations  
268 in most samples and appeared likely to be an endogenous metabolite, N-acetylproline (**F6,**  
269 **Supplemental Fig. S1**). No supportive mass spectrometry data could be obtained for the *m/z*  
270 feature 345.0777 (F7). The 56 metabolic features in C3 that were positively associated with  
271 these annotated environmental chemicals were related to pathways for antioxidant methionine  
272 (Met) and cysteine (Cys) regulation, urea cycle, amino acids (glycine, serine, alanine, threonine,  
273 aspartate, asparagine, lysine), glycerophospholipids, and purine and pyrimidine nucleotide  
274 metabolism (**Fig 3C**). Representative metabolites associated with these pathways of each  
275 community are indicated next to each community (**Fig 2**) and included amino acids (glutamate,  
276 serine, lysine, aspartate), a pyrimidine (orotidine), a purine (uric acid), and a coenzyme for  
277 mitochondrial electron transfer and the TCA cycle (dihydrolipoamide). Collectively, the results  
278 for T2 serum of women who subsequently developed breast cancer show that two suspect  
279 environmental chemicals, nitromethylene-piperidine and 2,4-dinitrophenol, along with oxalate,  
280 are closely associated with metabolic perturbations related to amino acid and nucleotide

281 metabolism. Other communities included lipids functioning in inflammation, sphingolipids and  
282 lipids, but no suspect environmental chemicals were identified for these communities.

283

### 284 *3.5 MWAS of T3 Environmental Chemicals and alterations in metabolic pathway*

285 Following the same experimental approach shown above, we examined the relationship of  
286 annotated matches of T3 suspect environmental chemicals (**Table 4**) and changes in metabolites  
287 using xMWAS (Uppal *et al.* 2018). Two major metabolic communities were identified (**Fig 4**),  
288 with the first community (labeled C4, orange) including metabolites associated exclusively with  
289  $m/z$  271.1195 (F18) and second community (C5, blue) including metabolites associated with  $m/z$   
290 214.9728 ( F19),  $m/z$  217.0866 (F20) and  $m/z$  215.0327 (F21) (**Fig 4**). Targeted mass  
291 spectrometry analysis of  $m/z$  271.1195 (F18) showed that this feature was likely ergosterol or  
292 related derivative (**F18, Supplemental Fig. S2**). Pathway enrichment analysis of the 650  
293 metabolic features of C4 showed associated pathways for arachidonate, leukotriene, linoleate,  
294 vitamin A, prostaglandins, vitamin E and steroid hormones (**Fig 5A**). Most of these pathways  
295 are closely related to inflammation and oxidative stress, as also found in T2 associations in C1  
296 and C2 (**Fig 3A, 3B**). Targeted mass spectrometry analyses showed that  $m/z$  214.9713 (F19) was  
297 likely a bromine adduct of a benzoic acid metabolite (**F19, Supplemental Fig. S2**);  $m/z$   
298 217.0866 (F20) had an MS<sup>2</sup> spectrum with 83% match to benzo[a]carbazole (**F20,**  
299 **Supplemental Fig. S2**);  $m/z$  215.0327 (F21) was a high abundance signal from glucose (**F21,**  
300 **Supplemental Fig. S2**). Pathway enrichment analysis of the 155 metabolic features in C5  
301 showed associations for sialic acid, pentose phosphate, N-glycan degradation, galactose,  
302 phosphatidylinositol, glycolysis and gluconeogenesis, butanoate, and glycosphingolipid  
303 pathways (**Fig 5B**). Representative metabolites associated with these pathways are indicated next



304 to each community (**Fig 4**). Collectively, suspect environmental chemicals in Communities 4  
305 and 5 include a benzoate derivative and benzo[a]carbazole, and metabolic pathway associations  
306 suggesting that breast cancer effects could be mediated through inflammatory lipids, glucose-  
307 related metabolism and estrogenic signaling.

308

### 309 *3.6 Comparisons of T2 and T3 suspect chemical-metabolic pathway associations*

310 In comparison of findings for T3 and T2, metabolic pathways for C4 in T3 showed considerable  
311 overlap with the pathways associated with C1 and C2 in T2. In contrast, the remaining  
312 community, C5, in T3 differed substantially from the remaining community, C3, in T2.  
313 Specifically, in T3, we identified a suspect benzoate and benzo[a]carbazole in breast cancer  
314 cases that were associated with pathways of carbohydrate metabolism functioning in  
315 extracellular matrix turnover and complex carbohydrate metabolism. In T2, we identified a  
316 suspect insecticide, 2-nitromethylpiperidine, a widely used commercial chemical, 2,4-  
317 dinitrophenol, and oxalic acid, in breast cancer cases that were associated with central pathways  
318 functioning in amino acid homeostasis, urea cycle, pyrimidine and purine metabolism, and  
319 defense against oxidative stress.

320

#### 321 **4. Discussion**

322 The present study applies a new exposome epidemiology approach to discover suspect  
323 environmental chemicals that may be implicated in breast cancer development. New suspect  
324 chemicals from this analysis include an insecticide, nitromethylene-piperidine; a common  
325 commercial chemical, 2,4-dinitrophenol; a heterocyclic amine with diverse commercial  
326 applications, benzo[a]carbazole; a benzoate derivative which could be derived from natural  
327 products or environmental chemicals; and oxalate, an endogenous metabolite that is also used as  
328 a cleaning agent. These chemicals were at higher abundance in serum of women decades before  
329 breast cancer diagnosis. Importantly, the network analysis is data-dependent, raising the  
330 possibility that individual chemicals could have a causal role in breast cancer or that breast  
331 cancer could occur through interaction of multiple chemicals in causal mechanisms. In the latter  
332 case, individual variations in exposure could have important impact on risk.

333  
334 New approaches to identify suspect carcinogens are critical because research over the last 50  
335 years has not translated to a strategy for individual breast cancer prevention. The suspect  
336 chemical signal F18 ( $m/z$  271.1195) in Community 4, was consistent with identification as  
337 ergosterol, which is derived from yeast and precursor of vitamin D2. Pathway mapping of this  
338 community showed overlap with inflammatory lipid pathways found in Communities 1 and 2,  
339 and also included vitamin A metabolism, which is consistent with feature F1 in Community 1, 4-  
340 hydroxyretinoic acid, being a suspect chemical. Many diet-derived carotenoids can be converted  
341 to isobaric species to 4-hydroxyretinoic acid, and these are not distinguished by the HRM  
342 methods used. Thus, future research will be needed to address the potential for diet-environment  
343 interactions, such as implied by the overlap of estrogen-, vitamin D- and vitamin A-linked

344 metabolites. Pregnancy impacts initiation, progression, and susceptibility to breast cancer (Troisi  
345 *et al.* 2018), and therefore pregnancy provides an appropriate time frame for study. Later age at  
346 pregnancy is a long-established breast cancer risk factor (Albrektsen *et al.* 2005; MacMahon *et*  
347 *al.* 1970) which has become increasingly common and is still unexplained. Because first birth  
348 rates have increased 6-fold for women ages 35-39 from 1973-2006 (Martin *et al.* 2015), more  
349 detailed understanding of the respective contributions and interactions must be a priority to learn  
350 how to mitigate risk for this population group of higher risk women.

351  
352 In T2, an additional chemical cluster containing an insecticide (nitromethylene-piperidine), a  
353 cleaning agent (oxalate), a chemical used in wood preservation and dye production  
354 (dinitrophenol), and two unidentified chemical features (F2, F7), were associated with multiple  
355 amino acid pathways and nitrogen metabolism (urea cycle, pyrimidine, purine). The amino acid  
356 pathways overlap with pathways previously found to vary with persistent organic pollutants,  
357 *p,p'*-DDT (Hu *et al.* 2020) and PBBs (Walker *et al.* 2019). In a multigenerational study, *p,p'*-  
358 DDT exposure in women before puberty was found to be associated with breast cancer in  
359 mothers (Cohn *et al.* 2007) and in utero *o',p'*-DDT exposure was associated with breast cancer in  
360 daughters (Cohn *et al.* 2015). Polybrominated biphenyls (PBB) are also persistent organic  
361 pollutants that cause breast cancer (IARC 2015). Potential mechanistic connections between  
362 dinitrophenol, nitromethylene-piperidine, oxalate, and these POPs are not apparent, and  
363 mechanisms by which POPs disrupt central amino acid and nitrogen metabolism pathways are  
364 not known. In particular, amino acids are essential for growth and development, and disruption  
365 of pyrimidine and purine metabolism can be expected to have long-term consequences on

366 metabolic programming which could contribute to cancer susceptibility. Thus, these findings  
367 warrant further investigation into underlying mechanisms related to breast cancer development.  
368  
369 In T3, the large metabolic community (C4, Fig 4) containing inflammatory lipids was linked to a  
370 sparse community (C5, Fig 4) containing glucose, benzo[a]carbazole and a suspect benzoate  
371 derivative. Of potential importance in this network, the glucose signal was negatively associated  
372 with metabolites connected to sialic acid, N-glycan and other pathways associated with  
373 extracellular matrix and turnover of connective tissue. Benzoate is conjugated with glycine for  
374 elimination, and the role of glycine in folate-dependent metabolism through the vitamin B<sub>6</sub>-  
375 dependent hydroxymethyltransferase raises the possibility that benzoate derivatives could have  
376 unrecognized pathogenic effects. Similarly, the heterocyclic amine, benzo[a]carbazole, could be  
377 bioactivated by Cyp enzymes to generate mutagenic species which have not been characterized.  
378 Future hypothesis-driven research will be needed to address these possibilities.

379  
380 The exposome epidemiology approach used in the present study has important assumptions, i.e.,  
381 that chemical exposures which increase cancer risk can occur decades before breast cancer  
382 occurrence, that these exposures are detectable and at higher abundance in serum decades prior  
383 to breast cancer detection, and that network analyses of HRM data are sufficient to detect these  
384 exposures and link them to biologic responses. With these assumptions, all HRM features from  
385 archival blood serum of women collected decades before breast cancer diagnosis can be used in a  
386 non-targeted manner to select ones that are increased ( $p < 0.05$ ) in association with breast cancer  
387 occurrence. This selection criterion is not suitable for biomarker development because of  
388 multiple testing; however, this cutoff is suitable for discovery of potential chemical risk factors

389 because any of the features at this cutoff could be correct. The selected HRM features are then  
390 used with a toxic exposome database, T3DB, to obtain accurate mass matches to known toxic  
391 chemicals, and these are subjected to non-targeted network and pathway enrichment analyses to  
392 identify environmental chemical-metabolic network associations linked to breast cancer  
393 outcome.

394  
395 Exposome epidemiology will benefit from populations of tens or hundreds of thousands of  
396 individuals by enabling detection of exposures impacting small numbers of women and/or  
397 having only small contributions individually to breast cancer risk. The present study with only  
398 hundreds rather than thousands of individuals has limited capability to detect carcinogens with  
399 small effect size. Additionally, selection of HRM features for statistical selection in the current  
400 study required that features be present in 80% of the samples. Environmental chemicals and  
401 personal use products such as hair dyes cannot be expected to be present in 80% of the women  
402 and unlikely to be detectable. Application of untargeted gas chromatography-high-resolution  
403 mass spectrometry, which provides capabilities to measure other hydrophobic and volatile  
404 environmental chemicals (Hu *et al.* 2021), can be used to enhance coverage of environmental  
405 chemicals. Thus, future studies will benefit from larger population sizes, inclusion of  
406 complementary chemical analyses, and use of statistical methods which can accommodate sparse  
407 environmental chemical detection.

408

## 409 **5. Conclusion**

410 Recent technological and statistical advances in high-resolution metabolomics (HRM) provide  
411 capabilities for omics scale biomonitoring of chemicals derived from the environment along with

412 endogenous metabolism and chemicals from the diet, intestinal microbiome, dietary supplements,  
413 pharmaceuticals, and personal use products. Because the metabolome is a functional readout of  
414 the interactions of a person's genes with exposures, HRM of biologic samples provides one of  
415 the most accessible ways to connect environmental exposures with biologic status to anticipate  
416 breast cancer. As shown in the present study, these can be used with network and pathway  
417 analysis to identify suspect environmental chemicals and functional communities linked to breast  
418 cancer outcome. Such network approaches can be broadly applied to discover how life-long  
419 exposures impact personal cancer risks. For breast cancer, we believe that this approach will  
420 yield critically needed protocols to enhance protection or mediate pregnancy-associated risk.

421

422 **Funding:** This study was supported by Department of Defense Grant W81XWH2010103, and  
423 National Institute of Environmental Health and Science grant R21 ES031824, R01 ES031980  
424 and P30 ES019776.

425

426 **References**

- 427
- 428 Albrektsen, G.; Heuch, I.; Hansen, S.; Kvale, G. Breast cancer risk by age at birth, time since  
429 birth and time intervals between births: exploring interaction effects. *British Journal of*  
430 *Cancer* 2005;92:167-175
- 431 Cohn, B.A.; Cirillo, P.M.; Hopper, B.R.; Siiteri, P.K. Third Trimester Estrogens and Maternal  
432 Breast Cancer: Prospective Evidence. *J Clin Endocrinol Metab* 2017;102:3739-3748
- 433 Cohn, B.A.; La Merrill, M.; Krigbaum, N.Y.; Yeh, G.; Park, J.S.; Zimmermann, L.; Cirillo, P.M.  
434 DDT Exposure in Utero and Breast Cancer. *J Clin Endocrinol Metab* 2015;100:2865-  
435 2872
- 436 Cohn, B.A.; Wolff, M.S.; Cirillo, P.M.; Sholtz, R.I. DDT and breast cancer in young women:  
437 new data on the significance of age at exposure. *Environ Health Perspect* 2007;115:1406-  
438 1414
- 439 Go, Y.M.; Kim, C.W.; Walker, D.I.; Kang, D.W.; Kumar, S.; Orr, M.; Uppal, K.; Quyyumi, A.A.;  
440 Jo, H.; Jones, D.P. Disturbed flow induces systemic changes in metabolites in mouse  
441 plasma: a metabolomics study using ApoE(-)/(-) mice with partial carotid ligation. *Am J*  
442 *Physiol Regul Integr Comp Physiol* 2015;308:R62-72
- 443 Hu, X.; Li, S.; Cirillo, P.; Krigbaum, N.; Tran, V.; Ishikawa, T.; La Merrill, M.A.; Jones, D.P.;  
444 Cohn, B. Metabolome Wide Association Study of serum DDT and DDE in Pregnancy  
445 and Early Postpartum. *Reprod Toxicol* 2020;92:129-137
- 446 Hu, X.; Li, S.; Cirillo, P.M.; Krigbaum, N.Y.; Tran, V.; Jones, D.P.; Cohn, B.A. Metabolome  
447 Wide Association Study of Serum Poly and Perfluoroalkyl Substances (PFASs) in  
448 Pregnancy and Early Postpartum. *Reprod Toxicol* 2019;87:70-78

449 Hu, X.; Walker, D.I.; Liang, Y.; Smith, M.R.; Orr, M.L.; Juran, B.D.; Ma, C.; Uppal, K.; Koval,  
450 M.; Martin, G.S.; Neujahr, D.C.; Marsit, C.J.; Go, Y.M.; Pennell, K.D.; Miller, G.W.;  
451 Lazaridis, K.N.; Jones, D.P. A scalable workflow to characterize the human exposome.  
452 Nat Commun 2021;12:5575

453 IARC. Polychlorinated Biphenyls and Polybrominated Biphenyls ed^eds; 2015

454 Jarrell, Z.R.; Smith, M.R.; He, X.; Orr, M.; Jones, D.P.; Go, Y.M. Firsthand and Secondhand  
455 Exposure Levels of Maltol-Flavored Electronic Nicotine Delivery System Vapors Disrupt  
456 Amino Acid Metabolism. Toxicol Sci 2021;182:70-81

457 Jarrell, Z.R.; Smith, M.R.; Hu, X.; Orr, M.; Liu, K.H.; Quyyumi, A.A.; Jones, D.P.; Go, Y.M.  
458 Plasma acylcarnitine levels increase with healthy aging. Aging (Albany NY)  
459 2020;12:13555-13570

460 Johnson, C.H.; Athersuch, T.J.; Collman, G.W.; Dhungana, S.; Grant, D.F.; Jones, D.P.; Patel,  
461 C.J.; Vasiliou, V. Yale school of public health symposium on lifetime exposures and  
462 human health: the exposome; summary and future reflections. Human genomics  
463 2017;11:32

464 Jones, D.P.; Cohn, B.A. A vision for exposome epidemiology: The pregnancy exposome in  
465 relation to breast cancer in the Child Health and Development Studies. Reprod Toxicol  
466 2020;92:4-10

467 Jones, D.P.; Park, Y.; Ziegler, T.R. Nutritional metabolomics: progress in addressing complexity  
468 in diet and health. Annu Rev Nutr 2012;32:183-202

469 Jones, D.P.; Walker, D.I.; Uppal, K.; Rohrbeck, P.; Mallon, C.T.; Go, Y.M. Metabolic Pathways  
470 and Networks Associated With Tobacco Use in Military Personnel. Journal of  
471 occupational and environmental medicine 2016;58:S111-116



- 472 Li, S.; Cirillo, P.; Hu, X.; Tran, V.; Krigbaum, N.; Yu, S.; Jones, D.P.; Cohn, B. Understanding  
473 mixed environmental exposures using metabolomics via a hierarchical community  
474 network model in a cohort of California women in 1960's. *Reprod Toxicol* 2020;92:57-65
- 475 Li, S.; Park, Y.; Duraisingham, S.; Strobel, F.H.; Khan, N.; Soltow, Q.A.; Jones, D.P.; Pulendran,  
476 B. Predicting network activity from high throughput metabolomics. *PLoS Comput Biol*  
477 2013;9:e1003123
- 478 Liang, D.; Moutinho, J.L.; Golan, R.; Yu, T.; Ladva, C.N.; Niedzwiecki, M.; Walker, D.I.;  
479 Sarnat, S.E.; Chang, H.H.; Greenwald, R.; Jones, D.P.; Russell, A.G.; Sarnat, J.A. Use of  
480 high-resolution metabolomics for the identification of metabolic signals associated with  
481 traffic-related air pollution. *Environ Int* 2018;120:145-154
- 482 Lim, E.; Pon, A.; Djoumbou, Y.; Knox, C.; Shrivastava, S.; Guo, A.C.; Neveu, V.; Wishart, D.S.  
483 T3DB: a comprehensively annotated database of common toxins and their targets.  
484 *Nucleic Acids Res* 2010;38:D781-786
- 485 MacMahon, B.; Cole, P.; Lin, T.M.; Lowe, C.R.; Mirra, A.P.; Ravnihar, B.; Salber, E.J.;  
486 Valaoras, V.G.; Yuasa, S. Age at first birth and breast cancer risk. *Bull World Health*  
487 *Organ* 1970;43:209-221
- 488 Martin, J.; Hamilton, B.; Osterman, M.; Curtin, S.; Matthews, T. Births: final data for 2013.  
489 National vital statistics reports: from the Centers for Disease Control and Prevention,  
490 National Center for Health Statistics, National Vital Statistics System 2015;64:1
- 491 Niedzwiecki, M.M.; Walker, D.I.; Vermeulen, R.; Chadeau-Hyam, M.; Jones, D.P.; Miller, G.W.  
492 The Exposome: Molecules to Populations. *Annu Rev Pharmacol Toxicol* 2019;59:107-  
493 127

- 494 Perkins, C.; Wright, W.; Schlag, R. Cancer Incidence and Mortality in California, 1988-1994,  
495 CA: California Department of Health Services, Cancer Surveillance Section.
- 496 Ritz, B.; Yan, Q.; He, D.; Wu, J.; Walker, D.I.; Uppal, K.; Jones, D.P.; Heck, J.E. Child serum  
497 metabolome and traffic-related air pollution exposure in pregnancy. *Environ Res*  
498 2022;203:111907
- 499 Scalbert, A.; Andres-Lacueva, C.; Arita, M.; Kroon, P.; Manach, C.; Urpi-Sarda, M.; Wishart, D.  
500 Databases on food phytochemicals and their health-promoting effects. *J Agric Food*  
501 *Chem* 2011;59:4331-4348
- 502 Schymanski, E.L.; Jeon, J.; Gulde, R.; Fenner, K.; Ruff, M.; Singer, H.P.; Hollender, J.  
503 Identifying small molecules via high resolution mass spectrometry: communicating  
504 confidence. *Environ Sci Technol* 2014;48:2097-2098
- 505 Troisi, R.; Bjørge, T.; Gissler, M.; Grotmol, T.; Kitahara, C.M.; Myrtveit Saether, S.; Ording,  
506 A.G.; Sköld, C.; Sørensen, H.T.; Trabert, B. The role of pregnancy, perinatal factors and  
507 hormones in maternal cancer risk: a review of the evidence. *J Intern Med* 2018;283:430-  
508 445
- 509 Uppal, K.; Ma, C.; Go, Y.M.; Jones, D.P.; Wren, J. xMWAS: a data-driven integration and  
510 differential network analysis tool. *Bioinformatics* 2018;34:701-702
- 511 Uppal, K.; Walker, D.I.; Jones, D.P. xMSannotator: An R Package for Network-Based  
512 Annotation of High-Resolution Metabolomics Data. *Anal Chem* 2017;89:1063-1067
- 513 van den Berg, B.J.; Christianson, R.E.; Oechsli, F.W. The California Child Health and  
514 Development Studies of the School of Public Health, University of California at Berkeley.  
515 *Paediatr Perinat Epidemiol* 1988;2:265-282

516 Walker, D.I.; Marder, M.E.; Yano, Y.; Terrell, M.; Liang, Y.; Barr, D.B.; Miller, G.W.; Jones,  
517 D.P.; Marcus, M.; Pennell, K.D. Multigenerational metabolic profiling in the Michigan  
518 PBB registry. *Environ Res* 2019;172:182-193

519 Wilkinson, M.D.; Dumontier, M.; Aalbersberg, I.J.; Appleton, G.; Axton, M.; Baak, A.;  
520 Blomberg, N.; Boiten, J.W.; da Silva Santos, L.B.; Bourne, P.E.; Bouwman, J.; Brookes,  
521 A.J.; Clark, T.; Crosas, M.; Dillo, I.; Dumon, O.; Edmunds, S.; Evelo, C.T.; Finkers, R.;  
522 Gonzalez-Beltran, A.; Gray, A.J.; Groth, P.; Goble, C.; Grethe, J.S.; Heringa, J.; t Hoen,  
523 P.A.; Hooft, R.; Kuhn, T.; Kok, R.; Kok, J.; Lusher, S.J.; Martone, M.E.; Mons, A.;  
524 Packer, A.L.; Persson, B.; Rocca-Serra, P.; Roos, M.; van Schaik, R.; Sansone, S.A.;  
525 Schultes, E.; Sengstag, T.; Slater, T.; Strawn, G.; Swertz, M.A.; Thompson, M.; van der  
526 Lei, J.; van Mulligen, E.; Velterop, J.; Waagmeester, A.; Wittenburg, P.; Wolstencroft, K.;  
527 Zhao, J.; Mons, B. The FAIR Guiding Principles for scientific data management and  
528 stewardship. *Sci Data* 2016;3:160018

529 Wishart, D.; Arndt, D.; Pon, A.; Sajed, T.; Guo, A.C.; Djoumbou, Y.; Knox, C.; Wilson, M.;  
530 Liang, Y.; Grant, J.; Liu, Y.; Goldansaz, S.A.; Rappaport, S.M. T3DB: the toxic  
531 exposome database. *Nucleic Acids Res* 2015;43:D928-934

532 Wishart, D.S. Identifying putative drug targets and potential drug leads: starting points for virtual  
533 screening and docking. *Methods Mol Biol* 2015;1215:425-444

534 Wishart, D.S.; Tzur, D.; Knox, C.; Eisner, R.; Guo, A.C.; Young, N.; Cheng, D.; Jewell, K.;  
535 Arndt, D.; Sawhney, S.; Fung, C.; Nikolai, L.; Lewis, M.; Coutouly, M.A.; Forsythe, I.;  
536 Tang, P.; Shrivastava, S.; Jeroncic, K.; Stothard, P.; Amegbey, G.; Block, D.; Hau, D.D.;  
537 Wagner, J.; Miniaci, J.; Clements, M.; Gebremedhin, M.; Guo, N.; Zhang, Y.; Duggan,  
538 G.E.; Macinnis, G.D.; Weljie, A.M.; Dowlatabadi, R.; Bamforth, F.; Clive, D.; Greiner,

539 R.; Li, L.; Marrie, T.; Sykes, B.D.; Vogel, H.J.; Querengesser, L. HMDB: the Human  
540 Metabolome Database. *Nucleic Acids Res* 2007;35:D521-526

541 **Figure Legends**

542

543 **Figure 1.** Exposome Epidemiology Workflow. The steps used in the current analysis are  
544 summarized in general form. In the first step, the study population and sample types can be  
545 selected for diverse purposes. In the second step, liquid chromatography, gas chromatography or  
546 other separation methods can be used with high-resolution mass spectrometry to generate tens of  
547 thousands of mass spectral features. For this purpose, multiple data extraction tools are  
548 available, and extraction parameters and filtration criteria can be selected to increase stringency  
549 or leniency in feature retention. For the third step, directionality of change is selected for  
550 features expected to have a causal or protective activity. For the fourth step, selected features are  
551 annotated using a relevant database. In the fifth step, selected and annotated features are used  
552 with network analysis to identify associated communities of mass spectral features. The sixth  
553 step applies pathway enrichment analysis to the associated communities of mass spectral features  
554 to characterize the associated biologic response. Finally, targeted mass spectral analysis of  
555 relevant mass spectral features provides prioritization for subsequent hypothesis-driven research  
556 to verify environmental chemical associations and underlying causal mechanisms.

557

558 **Figure 2.** Metabolome-Wide Association Study (MWAS) of T3DB-annotated chemicals higher  
559 in second trimester (T2) serum. Association of seventeen T3DB-annotated features (Table 3) that  
560 are higher in breast cancer than non-cases with the metabolome (9,042 metabolic features) from  
561 T2 serum (n=384 for non-cases, n=182 for breast cancer) are examined using xMWAS. The  
562 outcome of xMWAS analysis is visualized with two separate networks at  $|r| \geq 0.3$ . The networks  
563 include three communities (C1, C2, C3) and show central seven chemicals (F1-F7) with tight

564 connections [C1 (orange), C2 (blue), C3 (green)]. Representative metabolites of pathways  
565 associated with community are shown next to each community. DHET: dihydroxyeicosatrienoic  
566 acid, EETA: epoxyeicosatrienoic acid, TG: triglyceride, PC: phosphatidylcholine.

567  
568 **Figure 3.** Metabolic pathway associated with second trimester (T2) chemicals. Pathway  
569 enrichment analysis with metabolites of three network communities in **Fig. 2** was conducted  
570 using mummichog. **A)** A total of seven pathways were found altered with  $m/z$  315.1957 (F1) in  
571 **C1**, **B)** Eight pathways were altered with  $m/z$  334.2090 (F2) in C2, and **C)** Seven pathways were  
572 altered with environmental chemicals and drug metabolites (F3-F7) ( $p < 0.05$ ). The ratio of  
573 selected metabolites mapped to the listed pathway over the number of total pathway metabolites  
574 detected is provided to the right of each bar.

575  
576 **Figure 4.** Metabolome-Wide Association Study (MWAS) of T3DB-annotated chemicals higher  
577 in third trimester (T3) serum. Association of seven T3DB-annotated chemicals (Table 4) that are  
578 higher in breast cancer than non-cases with the metabolome (9,042 metabolic features) from T3  
579 serum ( $n=351$  for non-cases,  $n=172$  for breast cancer) are examined using xMWAS. The network  
580 is visualized at  $|r| \geq 0.3$  and includes two communities (C4 and C5) showing central four  
581 chemicals with tight connections [C4 (orange)] than C5 (blue)]. Representative metabolites of  
582 pathways associated with community are shown next to each community.

583  
584 **Figure 5.** Metabolic pathway associated with T3 chemicals. Pathway enrichment analysis with  
585 metabolites of two network communities in **Fig. 4** was conducted using mummichog. **A)** Seven  
586 pathways were found altered with F18 chemical in C1 and **B)** eight pathways were altered with

587 chemicals (F19-F21) in C2 ( $p < 0.05$ ). The ratio of selected metabolites mapped to the listed  
588 pathway over the number of total pathway metabolites detected is provided to the right of each  
589 bar.

590 **Table 1.** Characteristics of Study Population

| <b>Characteristic</b>                                         | <b>Non-Cases<br/>(N=413)</b> |              | <b>Cases (N=201)</b> |              |
|---------------------------------------------------------------|------------------------------|--------------|----------------------|--------------|
|                                                               | <b>Median</b>                | <b>(IQR)</b> | <b>Median</b>        | <b>(IQR)</b> |
| Year of mother's birth                                        | 1936                         | (9)          | 1931                 | (11)         |
| Year of blood draw                                            | 1962                         | (2)          | 1962                 | (2)          |
| Gestational day of T2 blood draw                              | 160                          | (33)         | 161                  | (29)         |
| Gestational day of T3 blood draw                              | 250                          | (17)         | 249                  | (16)         |
| BMI at first prenatal visit (kg/m <sup>2</sup> ) <sup>a</sup> | 22.1                         | (4.3)        | 22.6                 | (4.2)        |
| <b>Characteristic</b>                                         | <b>Percent</b>               |              | <b>Percent</b>       |              |
| Race                                                          |                              |              |                      |              |
| non-Hispanic Caucasian                                        | 70                           |              | 69                   |              |
| African American                                              | 20                           |              | 19                   |              |
| Hispanic                                                      | 2                            |              | 1                    |              |
| Asian                                                         | 6                            |              | 7                    |              |
| Mixed                                                         | 2                            |              | 3                    |              |



591 **Table 2.** HRM profiling of T2 and T3 serum samples comparing breast case and non-case  
592 groups ( $P \leq 0.05$ ). BC, breast cancer.

|                                                    | T2 (182 BC, 384 non-cases) | T3 (172 BC, 351 non-cases) |
|----------------------------------------------------|----------------------------|----------------------------|
| Total number of metabolic features                 | 9042                       | 9042                       |
| Features differing at. $p < 0.05$                  | 521                        | 557                        |
| Differing features with BC/non-cases ratio $> 1.0$ | 188                        | 151                        |

593 **Table 3.** T3DB-annotated  $m/z$  features higher in T2 serum of women who subsequently  
 594 developed breast cancer (BC) compared with non-cases ( $P \leq 0.05$ ). Targeted mass spectrometry  
 595 analysis was performed to aid in identification of features F1 to F7 which were found to occur in  
 596 central communities of Fig 2, indicated by asterisk (\*). T3DB annotations are provided for others  
 597 (F8-F17).

| <b>Feature</b> | <b>Name</b>                 | <b><math>m/z</math></b> | <b>RT (sec)</b> | <b>% Higher in BC</b> | <b>Category</b>          |
|----------------|-----------------------------|-------------------------|-----------------|-----------------------|--------------------------|
| F1*            | 4-Hydroxyretinoic acid      | 315.1957                | 177             | 20                    | Vitamin A metabolite     |
| F2*            | Unidentified                | 334.2090                | 125             | 20                    | Unidentified             |
| F3*            | 2-Nitromethylene-piperidine | 141.0670                | 278             | 10                    | Insecticide              |
| F4*            | 2,4-Dinitrophenol           | 183.0046                | 283             | 10                    | Multiple commercial uses |
| F5*            | Oxalic Acid                 | 88.9883                 | 129             | 10                    | Cleaning agent           |
| F6*            | N-acetyl-proline            | 156.0666                | 283             | 10                    | Endogenous metabolite    |
| F7*            | Unidentified                | 345.0777                | 51              | 20                    | Unidentified             |
| F8             | Flurbiprofen                | 225.0712                | 139             | 30                    | Anti-inflammatory drug   |

|     |                                                |          |     |    |                              |
|-----|------------------------------------------------|----------|-----|----|------------------------------|
| F9  | Quaternium-52                                  | 610.4093 | 195 | 20 | Quaternary ammonium salt     |
| F10 | Ethyl cyanoacrylate                            | 124.0404 | 14  | 10 | Cyanoacrylate glue component |
| F11 | 2-Chloro-4,5-xylol N-hydroxy-N-methylcarbamate | 228.0427 | 284 | 10 | Cholinesterase inhibitor     |
| F12 | Psoralen, Angelicin                            | 167.0135 | 20  | 20 | Skin nodule treatment,       |
| F13 | Hexazinone                                     | 273.1344 | 32  | 10 | Herbicide                    |
| F14 | MHP (Methyl hydrogen phthalate)                | 179.0350 | 138 | 10 | Organic compound             |
| F15 | 2-Hydroxyphenyl methylcarbamate                | 166.0508 | 212 | 10 | Pesticide                    |
| F16 | Levodopa                                       | 178.0510 | 23  | 20 | Dopamine precursor drug      |
| F17 | Phenylmercuric acetate                         | 337.0157 | 22  | 20 | Preservative                 |

598 **Table 4.** T3DB-annotated  $m/z$  features higher in T3 serum of women who subsequently  
 599 developed breast cancer (BC) compared with those in the non-case women ( $P \leq 0.05$ ). Targeted  
 600 mass spectrometry analysis was performed to aid in identification of features F18-F21 which  
 601 were found to occur in central communities of Fig 4, indicated by asterisk (\*). T3DB annotation  
 602 is provided for others (F22-F24).

| <b>Feature</b> | <b>Name</b>         | <b><math>m/z</math></b> | <b>RT (sec)</b> | <b>% Higher in BC</b> | <b>Category</b>       |
|----------------|---------------------|-------------------------|-----------------|-----------------------|-----------------------|
| F18*           | Ergosterol          | 271.1195                | 25              | 10                    | Vitamin D2 precursor  |
| F19*           | Benzoate derivative | 214.9728                | 22.8            | 10                    | Food preservative     |
| F20*           | Benzo[a]carbazole   | 217.0866                | 21              | 10                    | Heterocyclic amine    |
| F21*           | Glucose             | 215.0327                | 23              | 10                    | Endogenous metabolite |
| F22            | Trimethadione       | 142.0509                | 277             | 10                    | Anticonvulsant        |
| F23            | Heptabromobiphenyl  | 734.4246                | 195             | 20                    | Aromatic compound     |
| F24            | Chlorpromazine      | 317.0876                | 135             | 10                    | Antipsychotics        |

603 **Fig 1.**

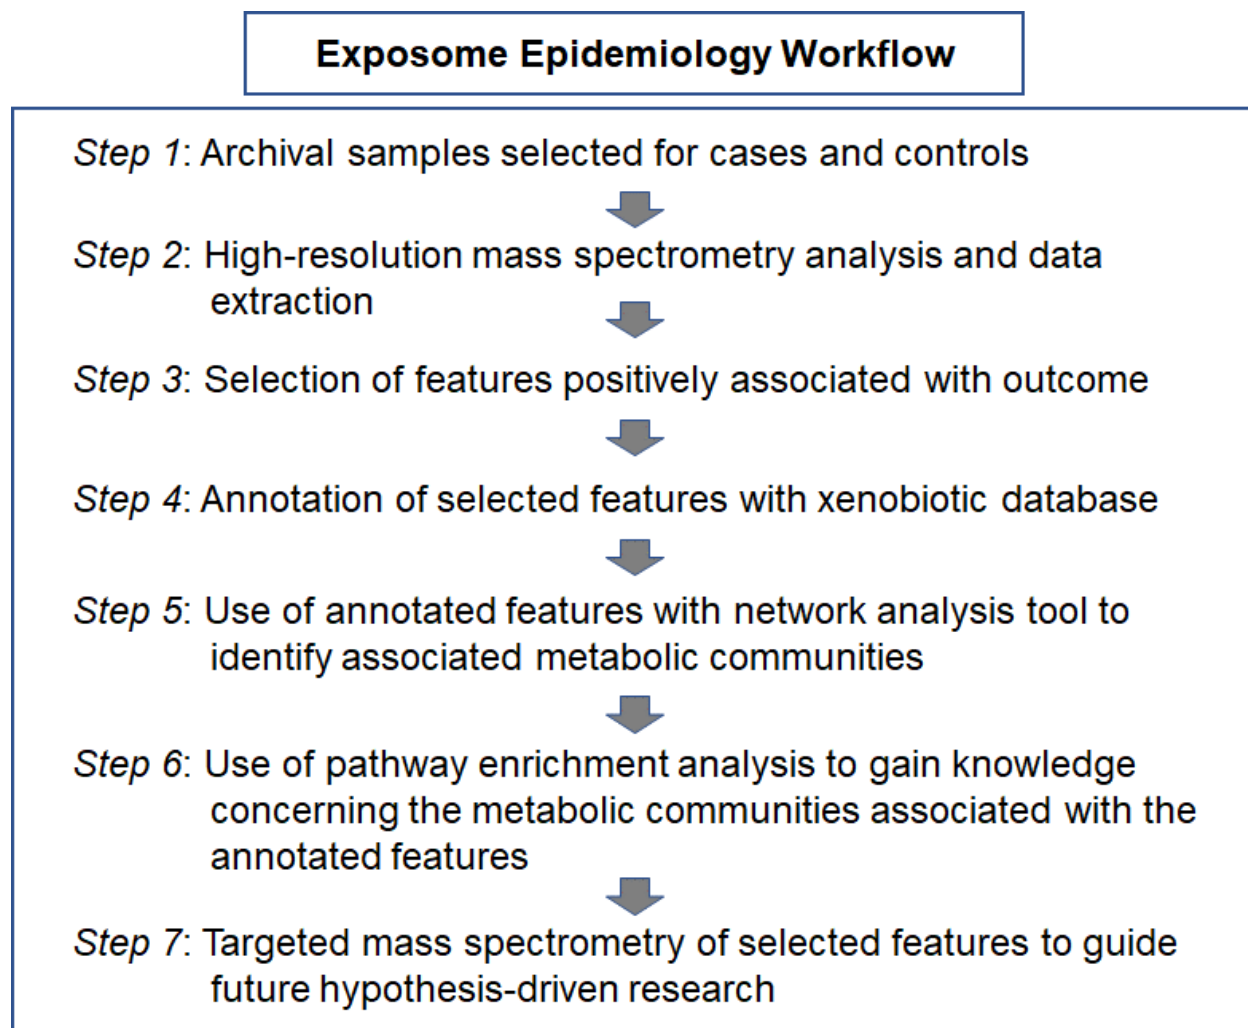

604 **Fig. 2**

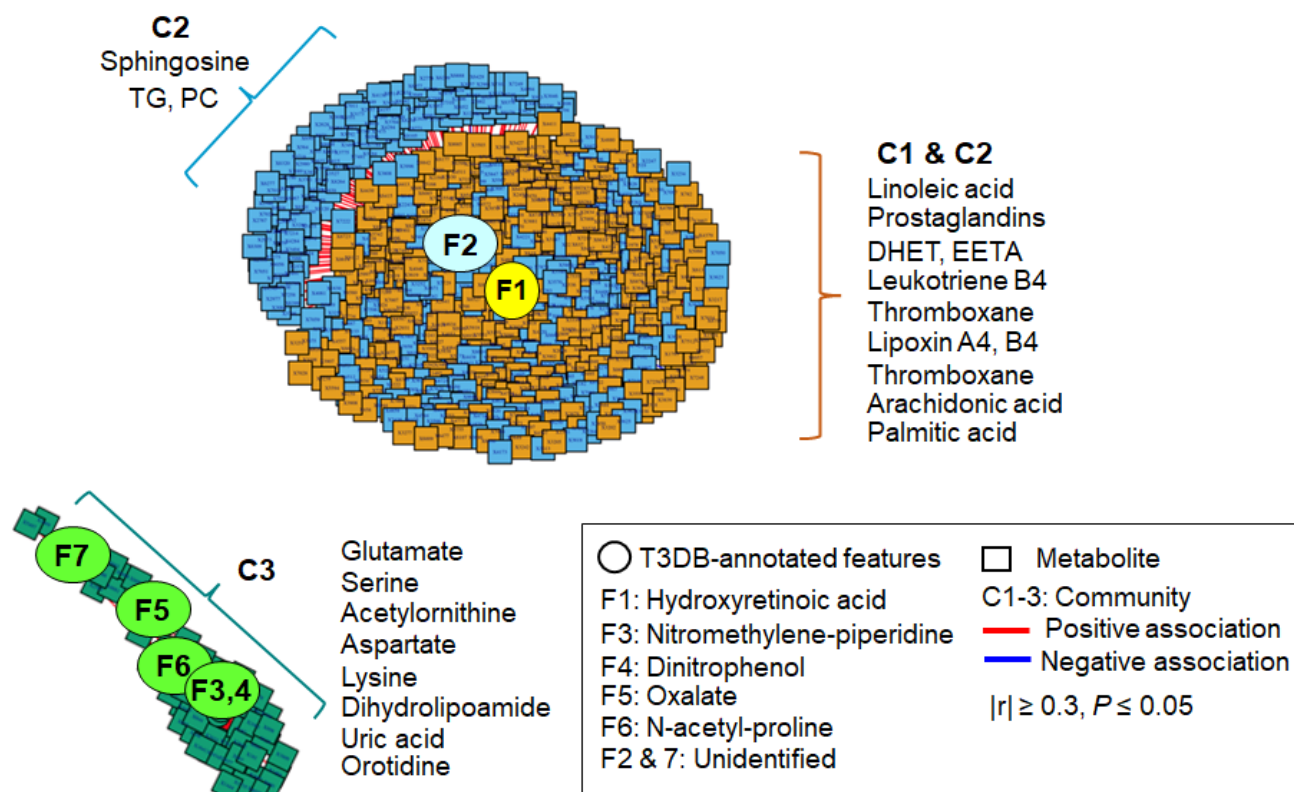

605 **Fig. 3**

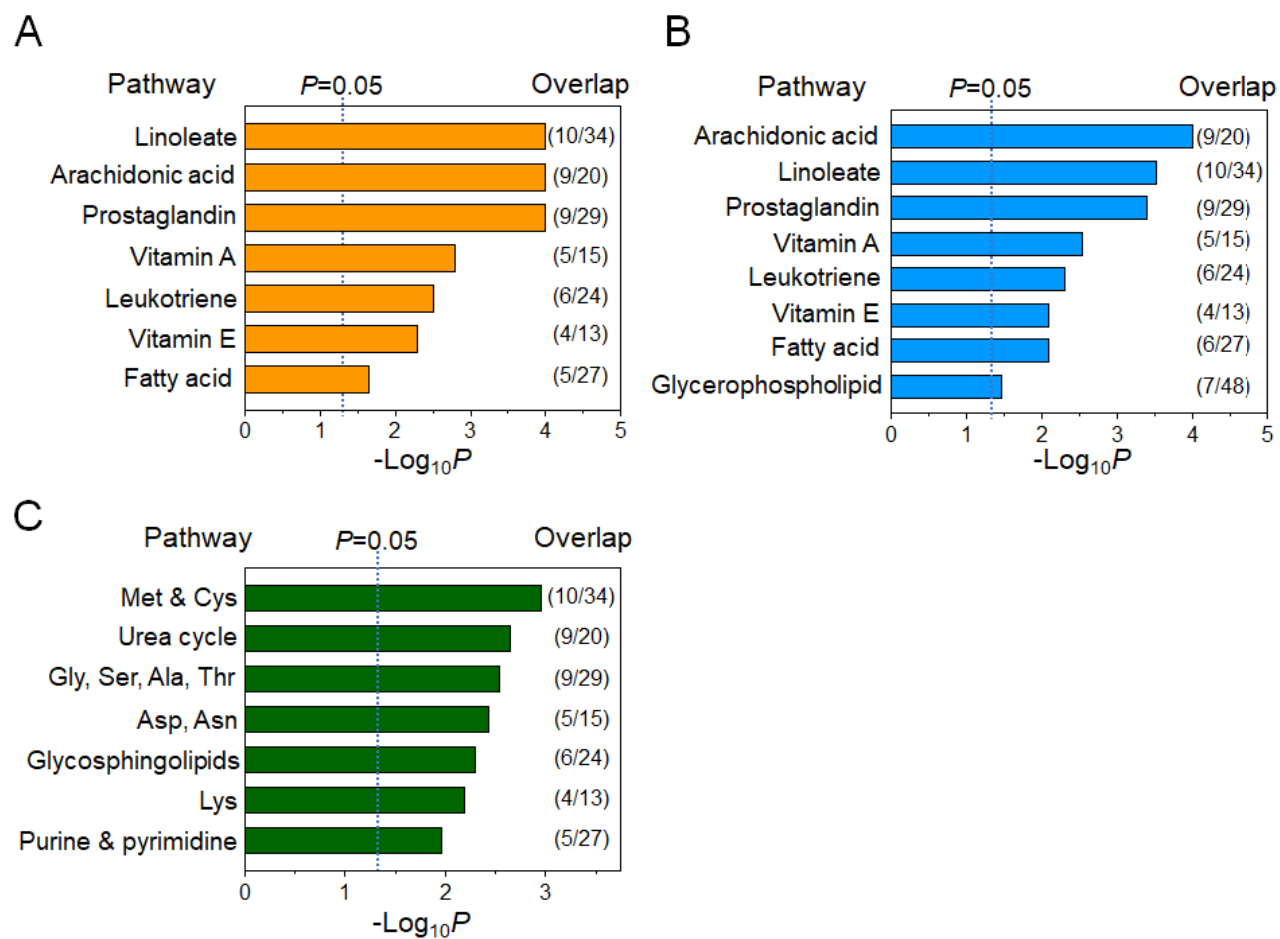

606 **Fig. 4**

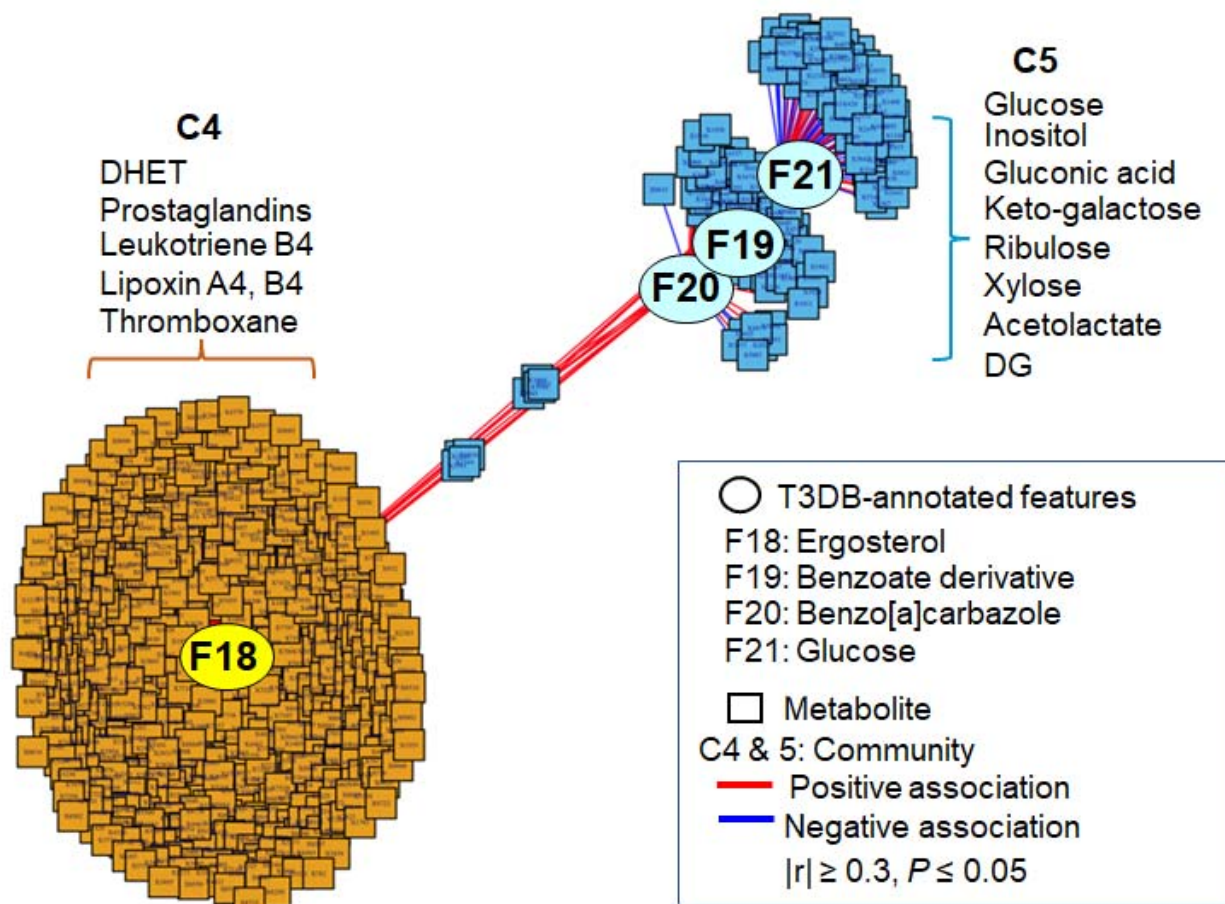



607 **Fig. 5**

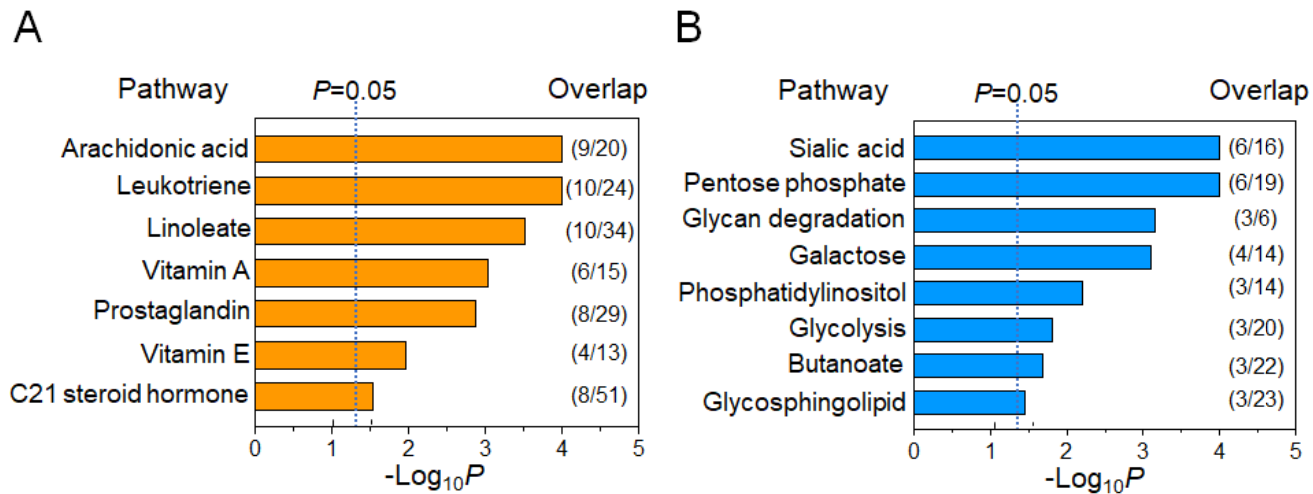

Source: https://medrxiv.org/content/medrxiv/early/2023/06/27/2023.06.20.23291648.full.pdf
