# Supplementary material for: Exposome Epidemiology for Suspect Environmental Chemical Exposures during Pregnancy Linked to Subsequent Breast Cancer Diagnosis
Source: bioRxiv or medRxiv preprint supplement (doi:10.1101/2023.06.20.23291648), 2023-06-27
Supplement: Supplementary file [file media-1.pdf]

# Supplemental Figure S1

# F1, 4-Hydroxyretinoic acid (315.1957 m/z, M-H)

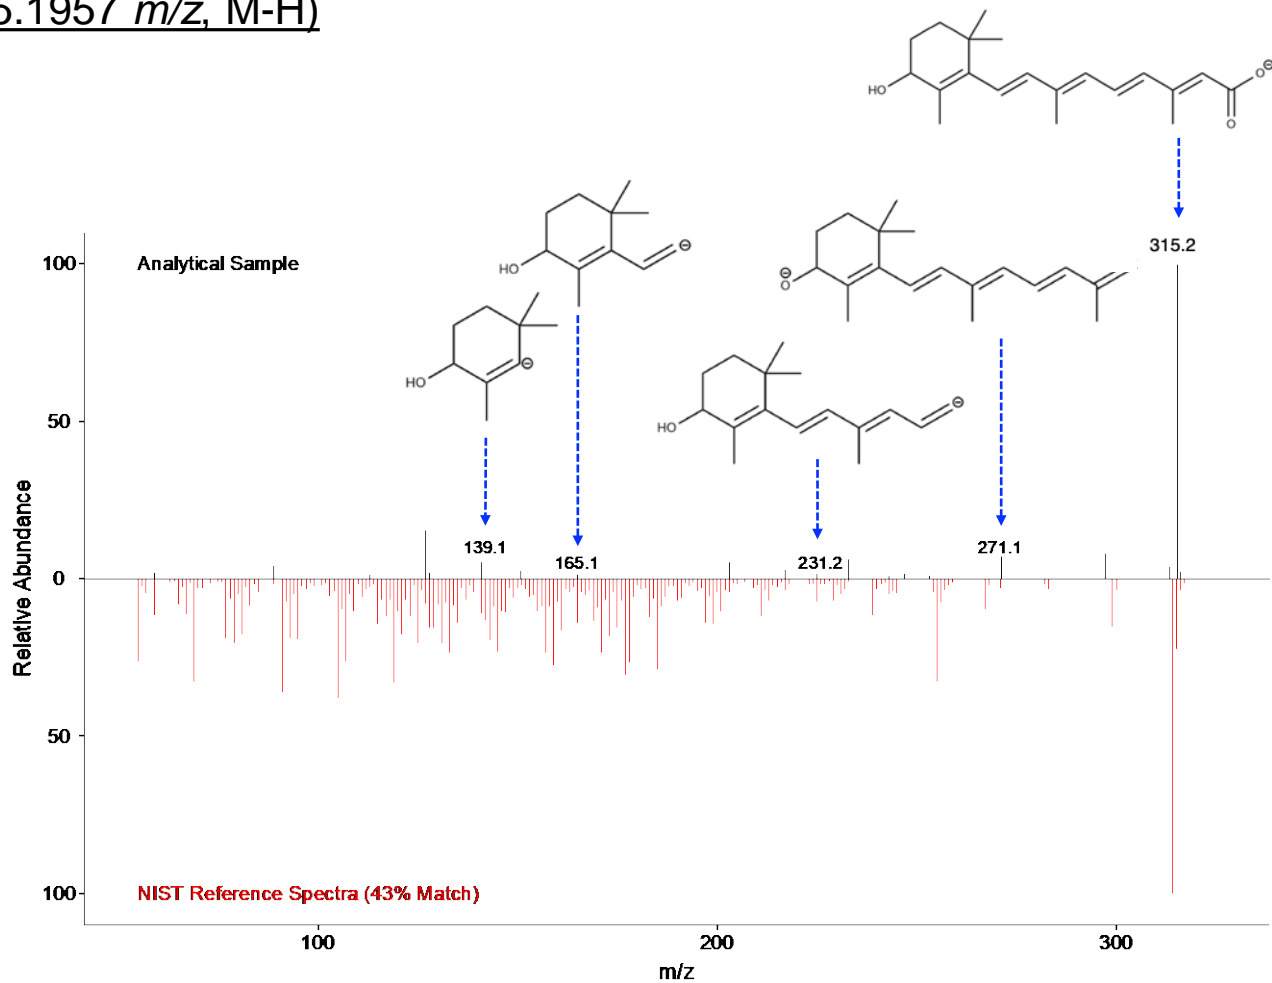

### F3, 2-Nitromethylene-piperidine (141.067 $m/z$ , M-H)

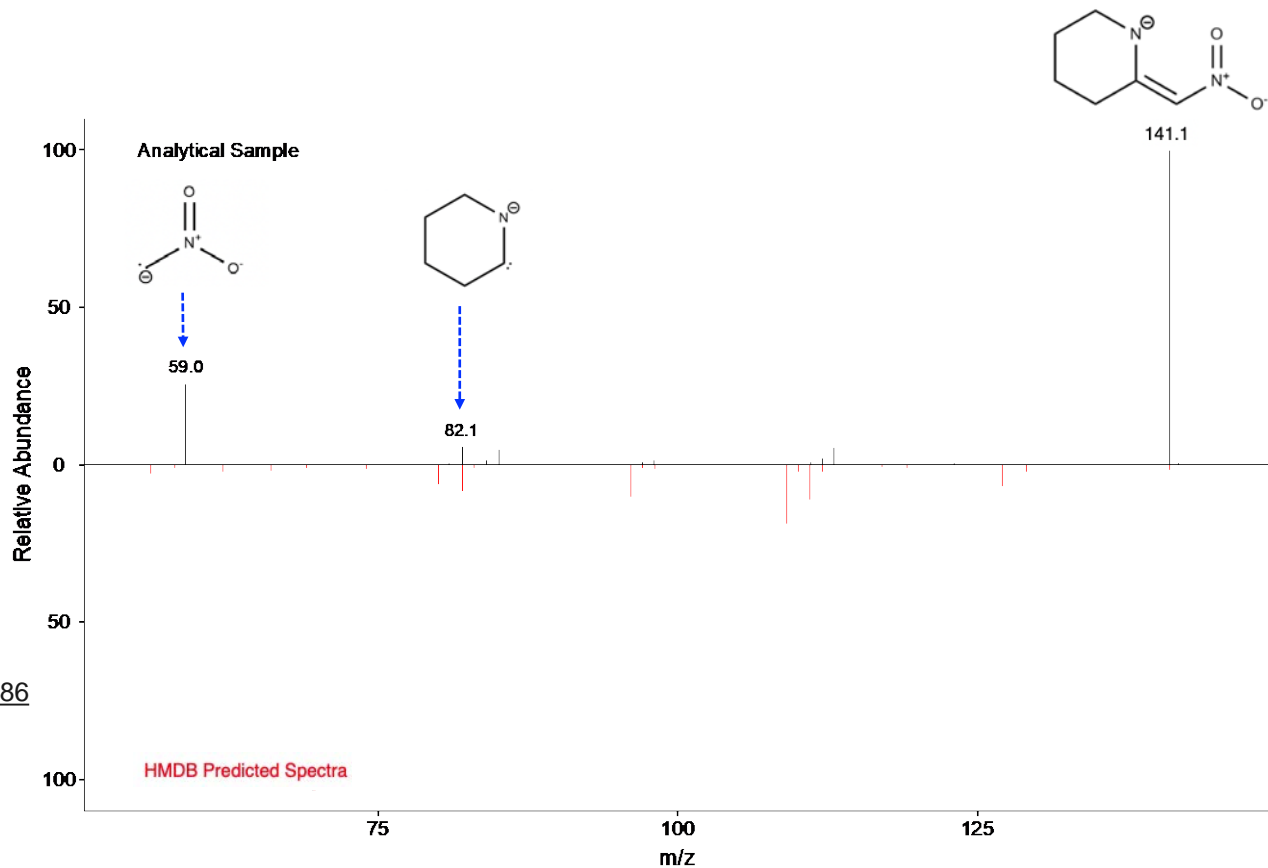

#### Reference Spectra

Source: [http://www.t3db.ca/spectra/ms\\_ms/144586](http://www.t3db.ca/spectra/ms_ms/144586)

CE: -20 V

Instrument: LC-MS/MS

# F4, 2,4-Dinitrophenol (183.0046 *m/z*, M-H)

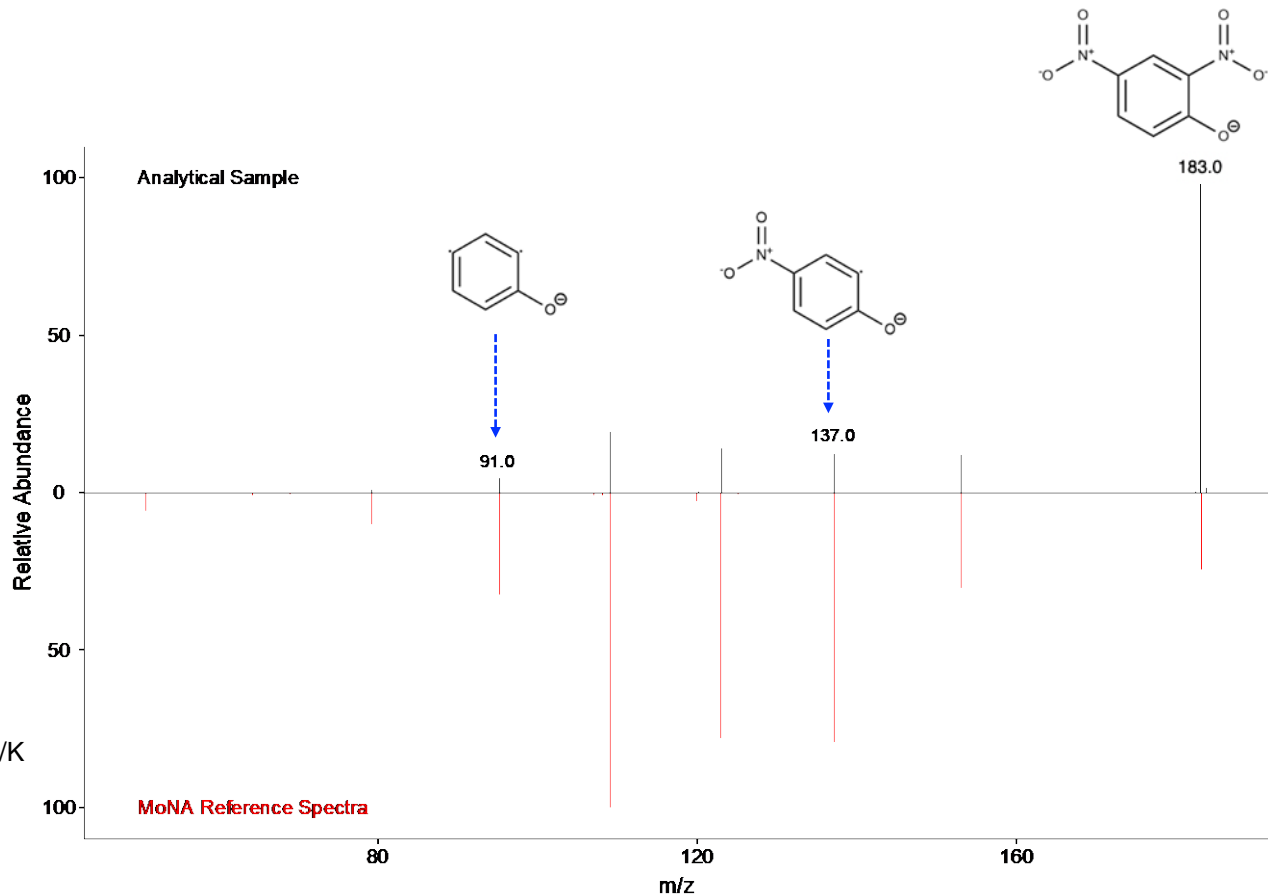

## Reference Spectra

Source:

<https://mona.fiehnlab.ucdavis.edu/spectra/display/K0000646>

CE: -30 V

Instrument: LC-ESI-QQ

# F6, N-Acetylproline (156.0666 $m/z$ , M-H)

## Note

Fragmentation pattern is also consistent with MoNA reference spectra. Source: <https://mona.fiehnlab.ucdavis.edu/spectra/display/MoNA023891>

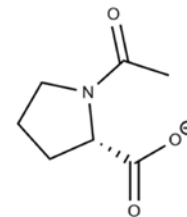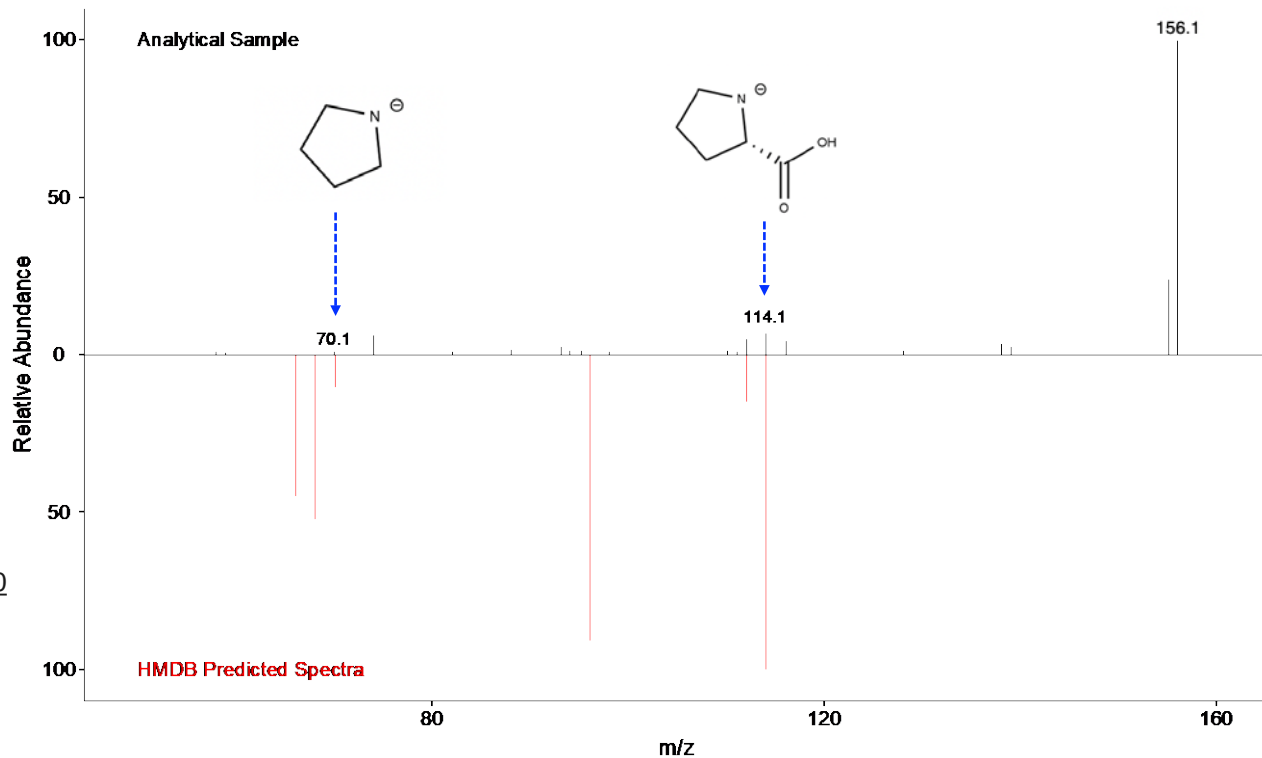

## Predicted Spectra

Source: [https://hmdb.ca/spectra/ms\\_ms/2581210](https://hmdb.ca/spectra/ms_ms/2581210)

CE: -20 V

Instrument: LC-QTOF
